# Supplementary material for: The Sequencing Bead Array (SBA), a Next-Generation Digital Suspension Array
Source: PubMed Central journal article supplement (PMC3792038; doi:10.1371/journal.pone.0076696), 2013-10-07

**OM-1078**

Reporter population: 10856  
 Polyclonality: 4820 (44.39%)  
 Low quality: 6020 (55.61%)  
 Uncalled reporters: 1229 (1.14%)  
 Called reporters: 9626 (88.75%)

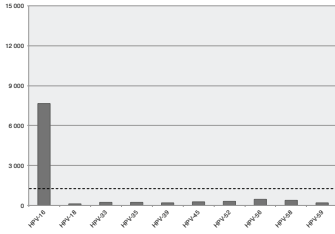**OM-1272**

Reporter population: 11870  
 Polyclonality: 5320 (44.82%)  
 Low quality: 6550 (55.18%)  
 Uncalled reporters: 1330 (11.21%)  
 Called reporters: 10540 (88.79%)

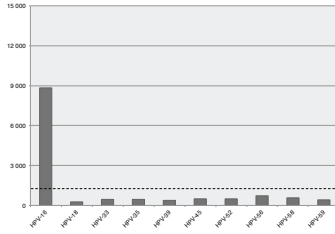**OM-1299**

Reporter population: 3226  
 Polyclonality: 820 (25.41%)  
 Low quality: 2406 (74.59%)  
 Uncalled reporters: 209 (6.48%)  
 Called reporters: 3017 (93.52%)

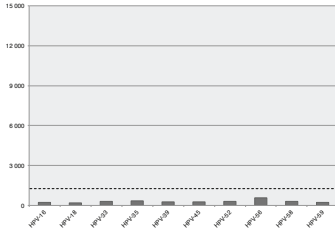**OM-1301**

Reporter population: 4233  
 Polyclonality: 1816 (42.90%)  
 Low quality: 2417 (57.10%)  
 Uncalled reporters: 719 (1.67%)  
 Called reporters: 3514 (83.33%)

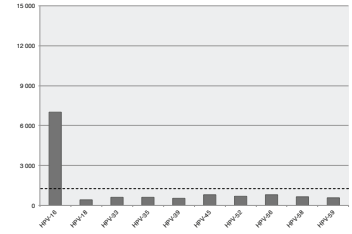**OM-1452**

Reporter population: 9937  
 Polyclonality: 3821 (38.46%)  
 Low quality: 6116 (61.54%)  
 Uncalled reporters: 1067 (1.07%)  
 Called reporters: 8870 (88.93%)

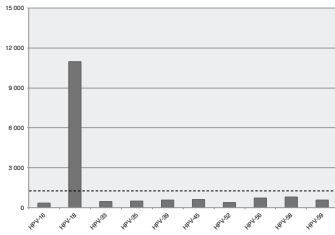**OM-1464**

Reporter population: 6267  
 Polyclonality: 2829 (45.14%)  
 Low quality: 3438 (54.86%)  
 Uncalled reporters: 438 (6.99%)  
 Called reporters: 5829 (93.01%)

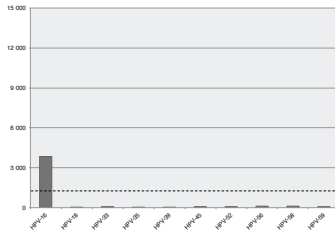**OM-1530**

Reporter population: 7436  
 Polyclonality: 4078 (54.71%)  
 Low quality: 3358 (45.29%)  
 Uncalled reporters: 1422 (1.91%)  
 Called reporters: 6014 (80.90%)

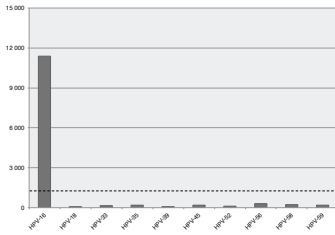**OM-1569**

Reporter population: 4197  
 Polyclonality: 1764 (41.79%)  
 Low quality: 2433 (58.21%)  
 Uncalled reporters: 813 (1.91%)  
 Called reporters: 1404 (33.46%)

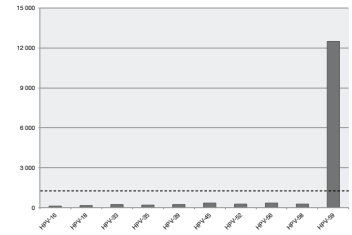**OM-1668**

Reporter population: 4152  
 Polyclonality: 1928 (46.43%)  
 Low quality: 2224 (53.57%)  
 Uncalled reporters: 170 (4.09%)  
 Called reporters: 1312 (31.62%)

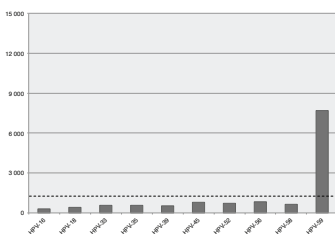**OM-1741**

Reporter population: 6293  
 Polyclonality: 3238 (51.45%)  
 Low quality: 3055 (48.55%)  
 Uncalled reporters: 728 (11.57%)  
 Called reporters: 5565 (88.43%)

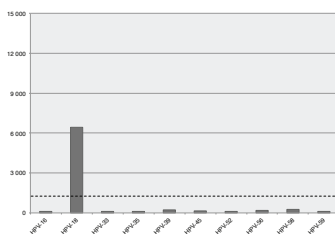**OM-1751**

Reporter population: 2916  
 Polyclonality: 724 (24.83%)  
 Low quality: 2192 (75.17%)  
 Uncalled reporters: 288 (9.88%)  
 Called reporters: 2628 (90.12%)

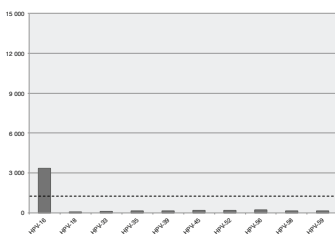**OM-1848**

Reporter population: 4204  
 Polyclonality: 1978 (47.05%)  
 Low quality: 2226 (52.95%)  
 Uncalled reporters: 627 (1.49%)  
 Called reporters: 1327 (31.57%)

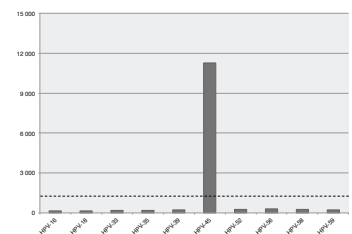**OM-1854**

Reporter population: 2686  
 Polyclonality: 1226 (45.68%)  
 Low quality: 1460 (54.32%)  
 Uncalled reporters: 92 (3.43%)  
 Called reporters: 814 (30.30%)

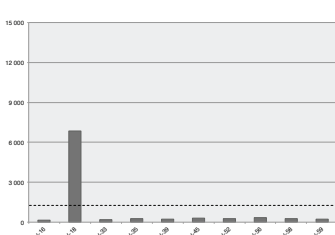**OM-1967**

Reporter population: 10218  
 Polyclonality: 4820 (47.18%)  
 Low quality: 5398 (52.82%)  
 Uncalled reporters: 1462 (1.43%)  
 Called reporters: 8756 (85.72%)

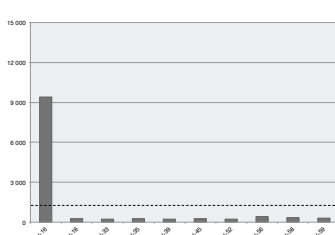**OM-1980**

Reporter population: 4471  
 Polyclonality: 4171 (93.29%)  
 Low quality: 500 (11.18%)  
 Uncalled reporters: 96 (2.15%)  
 Called reporters: 1740 (38.91%)

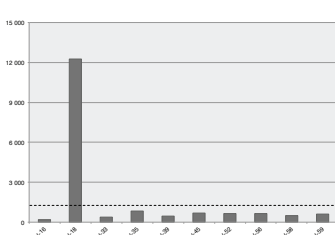**OM-2006**

Reporter population: 7029  
 Polyclonality: 2648 (37.69%)  
 Low quality: 4381 (62.31%)  
 Uncalled reporters: 478 (6.81%)  
 Called reporters: 6551 (93.19%)

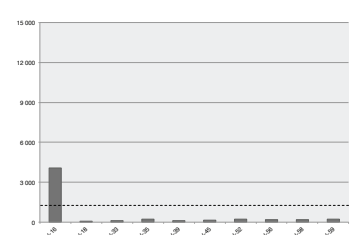**OM-2059**

Reporter population: 6263  
 Polyclonality: 1860 (29.70%)  
 Low quality: 4403 (70.30%)  
 Uncalled reporters: 417 (6.66%)  
 Called reporters: 5846 (93.34%)

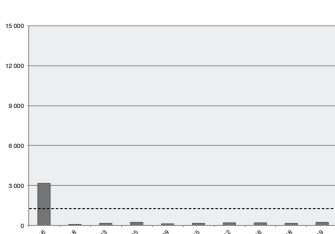**OM-2215**

Reporter population: 12078  
 Polyclonality: 6481 (53.74%)  
 Low quality: 5597 (46.26%)  
 Uncalled reporters: 1277 (10.6%)  
 Called reporters: 2051 (16.97%)

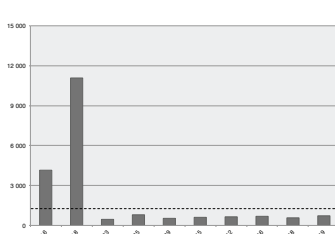**OM-2257**

Reporter population: 7006  
 Polyclonality: 4170 (59.54%)  
 Low quality: 2836 (40.46%)  
 Uncalled reporters: 89 (1.27%)  
 Called reporters: 6917 (98.73%)

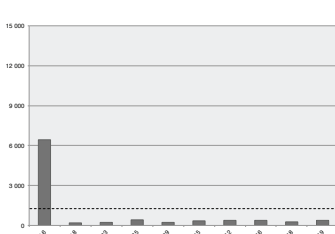**OM-2258**

Reporter population: 12733  
 Polyclonality: 5905 (46.38%)  
 Low quality: 6828 (53.62%)  
 Uncalled reporters: 1248 (9.8%)  
 Called reporters: 2055 (16.17%)

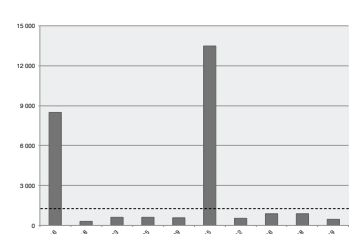

Supplement: pone.0076696.s002.pdf [file pone.0076696.s002.pdf]
