# Supplementary material for: The Sequencing Bead Array (SBA), a Next-Generation Digital Suspension Array
Source: PubMed Central journal article supplement (PMC3792038; doi:10.1371/journal.pone.0076696), 2013-10-07

**a**

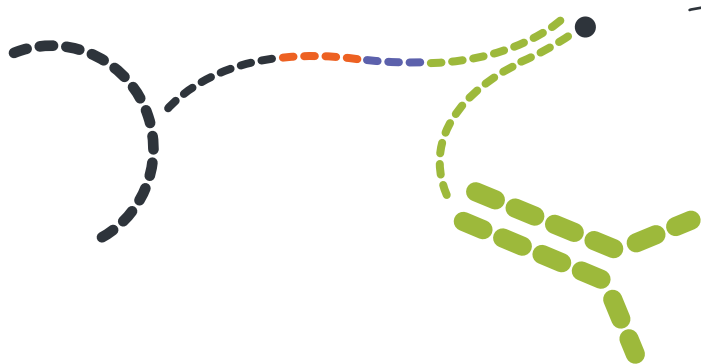

**b**

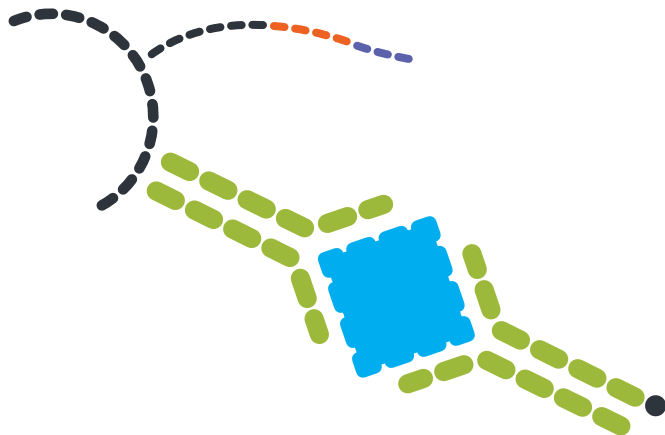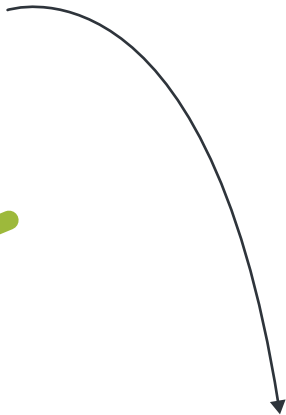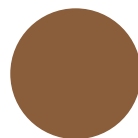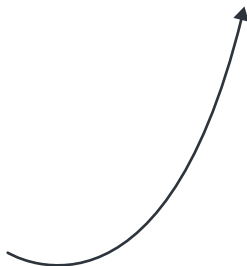

Supplement: pone.0076696.s004.pdf [file pone.0076696.s004.pdf]
