# Supplementary material for: The Sequencing Bead Array (SBA), a Next-Generation Digital Suspension Array
Source: PubMed Central journal article supplement (PMC3792038; doi:10.1371/journal.pone.0076696), 2013-10-07
Supplement: pone.0076696.s006.pdf [file pone.0076696.s006.pdf]

|                              |                                                                                           |              |                  |                                   |                  |              |                  |              |                  |
|------------------------------|-------------------------------------------------------------------------------------------|--------------|------------------|-----------------------------------|------------------|--------------|------------------|--------------|------------------|
| <b>Sequence:</b>             | <b>5'–Priming site – Key – ID trace X – Target hybridization site X – Linker site –3'</b> |              |                  |                                   |                  |              |                  |              |                  |
| <b>Priming site:</b>         | CCATCTCATCCCTGCGTGTCTCCGAC                                                                |              |                  |                                   |                  |              |                  |              |                  |
| <b>Key:</b>                  | TCAG                                                                                      |              |                  |                                   |                  |              |                  |              |                  |
|                              | <b>ID trace (MID #):</b>                                                                  |              |                  | <b>Target Hybridization site:</b> |                  |              |                  |              |                  |
| <b>HPV-16</b>                | ACGAGTGCGT (MID1)                                                                         |              |                  | TCCCCATGTCGTAGGTA                 |                  |              |                  |              |                  |
| <b>HPV-18</b>                | ACGCTCGACA (MID2)                                                                         |              |                  | TGCCCAGGTACAGGAGACTG              |                  |              |                  |              |                  |
| <b>HPV-33</b>                | AGCACTGTAG (MID4)                                                                         |              |                  | CTGTCACTAGTTACTTGTGTGC            |                  |              |                  |              |                  |
| <b>HPV-35</b>                | ATCAGACACG (MID5)                                                                         |              |                  | GACACAGCAGAACACACAGAC             |                  |              |                  |              |                  |
| <b>HPV-39</b>                | ATATCGCGAG (MID6)                                                                         |              |                  | GGTATGGAAGACTCTATAGAGG            |                  |              |                  |              |                  |
| <b>HPV-45</b>                | CGTGTCTCTA (MID7)                                                                         |              |                  | GGCACAGGATTTTGTGTAGAGGC           |                  |              |                  |              |                  |
| <b>HPV-52</b>                | TAGTATCAGC (MID9)                                                                         |              |                  | CTCGCCATGACGAAGGTATTCC            |                  |              |                  |              |                  |
| <b>HPV-56</b>                | TCTCTATGCG (MID10)                                                                        |              |                  | CTCCACATGTCTAAGGTACTG             |                  |              |                  |              |                  |
| <b>HPV-58</b>                | TGATACGTCT (MID11)                                                                        |              |                  | CCTTCCTTAGTTACTTCAGTGC            |                  |              |                  |              |                  |
| <b>HPV-59</b>                | TACTGAGCTA (MID12)                                                                        |              |                  | CACACACAGAAAGATTGGTGCTGCG         |                  |              |                  |              |                  |
| <b>Linker site:</b>          | ATCACCGACTGCCCATAGAGAGGCTGAGACTGCCAAGGCACACAGGGGATAGG                                     |              |                  |                                   |                  |              |                  |              |                  |
| <b>153 ID traces (MIDs):</b> |                                                                                           |              |                  |                                   |                  |              |                  |              |                  |
| <b>Name:</b>                 | <b>Sequence:</b>                                                                          | <b>Name:</b> | <b>Sequence:</b> | <b>Name:</b>                      | <b>Sequence:</b> | <b>Name:</b> | <b>Sequence:</b> | <b>Name:</b> | <b>Sequence:</b> |
| MID1                         | ACGAGTGCGT                                                                                | MID32        | AGTACGCTAT       | MID63                             | TAGTCGCATA       | MID94        | CGTATGCGAC       | MID125       | ATGTACGATG       |
| MID2                         | ACGCTCGACA                                                                                | MID33        | ATAGAGTACT       | MID64                             | TATATATACA       | MID95        | CGTCGATCTC       | MID126       | ATGTGTCTAG       |
| MID3                         | AGACGCACTC                                                                                | MID34        | CACGCTACGT       | MID65                             | TATGCTAGTA       | MID96        | CTACGACTGC       | MID127       | CACACGATAG       |
| MID4                         | AGCACTGTAG                                                                                | MID35        | CAGTAGACGT       | MID66                             | TCACGCGAGA       | MID97        | CTAGTCACTC       | MID128       | CACTCGCACG       |
| MID5                         | ATCAGACACG                                                                                | MID36        | CGACGTGACT       | MID67                             | TCGATAGTGA       | MID98        | CTCTACGCTC       | MID129       | CAGACGTCTG       |
| MID6                         | ATATCGCGAG                                                                                | MID37        | TACACACACT       | MID68                             | TCGCTGCGTA       | MID99        | CTGTACATAC       | MID130       | CAGTACTGCG       |
| MID7                         | CGTGTCTCTA                                                                                | MID38        | TACACGTGAT       | MID69                             | TCTGACGTCA       | MID100       | TAGACTGCAC       | MID131       | CGACAGCGAG       |
| MID8                         | CTCGCGTGTC                                                                                | MID39        | TACAGATCGT       | MID70                             | TGAGTCAGTA       | MID101       | TAGCGCGCGC       | MID132       | CGATCTGTCC       |
| MID9                         | TAGTATCAGC                                                                                | MID40        | TACGCTGTCT       | MID71                             | TGTAGTGTGA       | MID102       | TAGCTCTATC       | MID133       | CGCGTGCTAG       |
| MID10                        | TCTCTATGCG                                                                                | MID41        | TAGTGTAGAT       | MID72                             | TGTCACACGA       | MID103       | TATAGACATC       | MID134       | CGCTCGAGTG       |
| MID11                        | TGATACGTCT                                                                                | MID42        | TCGATCACGT       | MID73                             | TGTCGTCGCA       | MID104       | TATGATACGC       | MID135       | CGTGATGACG       |
| MID12                        | TACTGAGCTA                                                                                | MID43        | TCGCACTAGT       | MID74                             | ACACATACGC       | MID105       | TCACTCATAC       | MID136       | CTATGTACAG       |
| MID13                        | CATAGTAGTG                                                                                | MID44        | TCTAGCGACT       | MID75                             | ACAGTCGTGC       | MID106       | TCATCGAGTC       | MID137       | CTCGATATAG       |
| MID14                        | CGAGAGATAC                                                                                | MID45        | TCTATACTAT       | MID76                             | ACATGACGAC       | MID107       | TCGAGCTCTC       | MID138       | CTCGCACGCG       |
| MID15                        | ATACGACGTA                                                                                | MID46        | TGACGTATGT       | MID77                             | ACGACAGCTC       | MID108       | TCGCAGACAC       | MID139       | CTGCGTCACG       |
| MID16                        | TCACGTACTA                                                                                | MID47        | TGTGAGTAGT       | MID78                             | ACGTCTCATC       | MID109       | TCTGTCTCGC       | MID140       | CTGTGCGTCC       |
| MID17                        | CGTCTAGTAC                                                                                | MID48        | ACAGTATATA       | MID79                             | ACTCATCTAC       | MID110       | TGAGTGACGC       | MID141       | TAGCATACTG       |
| MID18                        | TCTACGTAGC                                                                                | MID49        | ACGCGATCGA       | MID80                             | ACTCGCGCAC       | MID111       | TGATGTGTAC       | MID142       | TATACATGTG       |
| MID19                        | TGTACTACTC                                                                                | MID50        | ACTAGCAGTA       | MID81                             | AGAGCGTCAC       | MID112       | TGCTATAGAC       | MID143       | TATCACTCAG       |
| MID20                        | ACGACTACAG                                                                                | MID51        | AGCTCACGTA       | MID82                             | AGCGACTAGC       | MID113       | TGCTCGCTAC       | MID144       | TATCTGATAG       |
| MID21                        | CGTAGACTAG                                                                                | MID52        | AGTATACATA       | MID83                             | AGTAGTGATC       | MID114       | ACGTGCAGCG       | MID145       | TCGTGACATG       |
| MID22                        | TACGAGTATG                                                                                | MID53        | AGTCGAGAGA       | MID84                             | AGTGACACAC       | MID115       | ACTCACAGAG       | MID146       | TCTGATCGAG       |
| MID23                        | TACTCTCGTG                                                                                | MID54        | AGTGCTACGA       | MID85                             | AGTGTATGTC       | MID116       | AGACTCAGCG       | MID147       | TGACATCTCG       |
| MID24                        | TAGAGACGAG                                                                                | MID55        | CGATCGTATA       | MID86                             | ATAGATAGAC       | MID117       | AGAGAGTGTG       | MID148       | TGAGCTAGAG       |
| MID25                        | TCGTCGCTCG                                                                                | MID56        | CGCAGTACGA       | MID87                             | ATATAGTCGC       | MID118       | AGCTATCGCG       | MID149       | TGATAGAGCG       |
| MID26                        | ACATACGCGT                                                                                | MID57        | CGCGTATACA       | MID88                             | ATCTACTGAC       | MID119       | AGTCTGACTG       | MID150       | TGCGTGTGCG       |
| MID27                        | ACGCGAGTAT                                                                                | MID58        | CGTACAGTCA       | MID89                             | CACGTAGATC       | MID120       | AGTGAGCTCG       | MID151       | TGCTAGTCAG       |
| MID28                        | ACTACTATGT                                                                                | MID59        | CGTACTCAGA       | MID90                             | CACGTGTCGC       | MID121       | ATAGCTCTCG       | MID152       | TGTATCACAG       |
| MID29                        | ACTGTACAGT                                                                                | MID60        | CTACGCTCTA       | MID91                             | CATACTCTAC       | MID122       | ATCACGTGCG       | MID153       | TGTGCGCGTG       |
| MID30                        | AGACTATACT                                                                                | MID61        | CTATAGCGTA       | MID92                             | CGACACTATC       | MID123       | ATCGTAGCAG       |              |                  |
| MID31                        | AGCGTCGTC                                                                                 | MID62        | TACGTCATCA       | MID93                             | CGAGACGCGC       | MID124       | ATCGTCTGTG       |              |                  |
