# Supplementary material for: The Sequencing Bead Array (SBA), a Next-Generation Digital Suspension Array
Source: PubMed Central journal article supplement (PMC3792038; doi:10.1371/journal.pone.0076696), 2013-10-07
Supplement: pone.0076696.s007.pdf [file pone.0076696.s007.pdf]

|                         |                  | Reporter population | Polyclonality | Low quality | Uncalled reporters | Called reporters | HPV-16   | HPV-18   | HPV-33   | HPV-35   | HPV-39   | HPV-45   | HPV-52   | HPV-56   | HPV-58   | HPV-59   | Conc. [g/ul] | Density [beads/ul] |
|-------------------------|------------------|---------------------|---------------|-------------|--------------------|------------------|----------|----------|----------|----------|----------|----------|----------|----------|----------|----------|--------------|--------------------|
| <b>L1</b>               | <b>calls</b>     | 6.50E+05            | 2.33E+05      | 4.54E+04    | 2.14E+04           | 3.50E+05         | 2.62E+04 | 2.31E+04 | 2.83E+04 | 3.91E+04 | 3.39E+04 | 4.54E+04 | 2.87E+04 | 3.96E+04 | 4.20E+04 | 4.40E+04 | 2.85E-08     | 6.14E+05           |
|                         | <b>frequency</b> |                     | 35.86%        | 6.98%       | 3.30%              | 53.86%           | 7.48%    | 6.59%    | 8.07%    | 11.16%   | 9.68%    | 12.96%   | 8.19%    | 11.31%   | 11.99%   | 12.56%   |              |                    |
| <b>L2</b>               | <b>calls</b>     | 7.34E+05            | 2.75E+05      | 6.88E+04    | 2.14E+04           | 3.68E+05         | 2.74E+04 | 2.41E+04 | 3.05E+04 | 3.95E+04 | 3.56E+04 | 4.75E+04 | 3.12E+04 | 4.28E+04 | 4.38E+04 | 4.58E+04 | 2.72E-08     | 5.85E+05           |
|                         | <b>frequency</b> |                     | 37.54%        | 9.37%       | 2.92%              | 50.17%           | 7.44%    | 6.54%    | 8.29%    | 10.72%   | 9.66%    | 12.91%   | 8.47%    | 11.61%   | 11.90%   | 12.45%   |              |                    |
| <b>L3</b>               | <b>calls</b>     | 6.96E+05            | 2.50E+05      | 6.71E+04    | 2.09E+04           | 3.59E+05         | 2.62E+04 | 2.38E+04 | 2.97E+04 | 3.81E+04 | 3.46E+04 | 4.63E+04 | 3.14E+04 | 4.21E+04 | 4.27E+04 | 4.39E+04 | 3.13E-08     | 6.74E+05           |
|                         | <b>frequency</b> |                     | 35.86%        | 9.63%       | 3.00%              | 51.50%           | 7.29%    | 6.64%    | 8.27%    | 10.62%   | 9.64%    | 12.90%   | 8.76%    | 11.73%   | 11.89%   | 12.25%   |              |                    |
| <b>L4</b>               | <b>calls</b>     | 7.55E+05            | 2.96E+05      | 7.09E+04    | 2.08E+04           | 3.67E+05         | 2.83E+04 | 2.66E+04 | 2.98E+04 | 3.81E+04 | 3.37E+04 | 4.72E+04 | 2.98E+04 | 4.38E+04 | 4.38E+04 | 4.63E+04 | 3.24E-08     | 6.98E+05           |
|                         | <b>frequency</b> |                     | 39.22%        | 9.39%       | 2.75%              | 48.63%           | 7.70%    | 7.24%    | 8.10%    | 10.36%   | 9.18%    | 12.85%   | 8.12%    | 11.93%   | 11.92%   | 12.60%   |              |                    |
| <b>L5</b>               | <b>calls</b>     | 6.55E+05            | 2.29E+05      | 6.53E+04    | 2.07E+04           | 3.40E+05         | 2.52E+04 | 2.26E+04 | 2.85E+04 | 3.64E+04 | 3.31E+04 | 4.33E+04 | 2.77E+04 | 3.91E+04 | 4.09E+04 | 4.30E+04 | 2.43E-08     | 5.23E+05           |
|                         | <b>frequency</b> |                     | 34.97%        | 9.97%       | 3.16%              | 51.90%           | 7.43%    | 6.66%    | 8.38%    | 10.72%   | 9.73%    | 12.75%   | 8.15%    | 11.52%   | 12.03%   | 12.65%   |              |                    |
| <b>L6</b>               | <b>calls</b>     | 6.34E+05            | 1.76E+05      | 8.09E+04    | 2.09E+04           | 3.56E+05         | 2.64E+04 | 2.36E+04 | 2.99E+04 | 3.86E+04 | 3.57E+04 | 4.42E+04 | 2.95E+04 | 4.17E+04 | 4.25E+04 | 4.41E+04 | 2.15E-08     | 4.62E+05           |
|                         | <b>frequency</b> |                     | 27.74%        | 12.77%      | 3.29%              | 56.20%           | 7.41%    | 6.63%    | 8.40%    | 10.84%   | 10.03%   | 12.40%   | 8.29%    | 11.71%   | 11.92%   | 12.37%   |              |                    |
| <b>AVG calls</b>        |                  | 6.87E+05            | 2.43E+05      | 6.64E+04    | 2.10E+04           | 3.57E+05         | 2.66E+04 | 2.40E+04 | 2.94E+04 | 3.83E+04 | 3.44E+04 | 4.56E+04 | 2.97E+04 | 4.15E+04 | 4.26E+04 | 4.45E+04 | 2.75E-08     | 5.93E+05           |
| <b>AVG frequency</b>    |                  |                     | 35.20%        | 9.68%       | 3.07%              | 52.04%           | 7.46%    | 6.72%    | 8.25%    | 10.74%   | 9.65%    | 12.79%   | 8.33%    | 11.64%   | 11.94%   | 12.48%   |              |                    |
| <b>STDEV calls</b>      |                  | 4.93E+04            | 4.18E+04      | 1.17E+04    | 3.29E+02           | 1.07E+04         | 1.07E+03 | 1.38E+03 | 8.84E+02 | 1.07E+03 | 1.07E+03 | 1.68E+03 | 1.43E+03 | 1.81E+03 | 1.12E+03 | 1.27E+03 | 4.16E-09     | 8.95E+04           |
| <b>STDEV frequency</b>  |                  |                     | 3.95%         | 1.85%       | 0.22%              | 2.68%            | 0.13%    | 0.26%    | 0.14%    | 0.26%    | 0.27%    | 0.21%    | 0.25%    | 0.21%    | 0.06%    | 0.15%    |              |                    |
| <b>MAXDEV calls</b>     |                  | 6.79E+04            | 5.30E+04      | 1.45E+04    | 4.20E+02           | 1.14E+04         | 1.67E+03 | 2.60E+03 | 1.10E+03 | 1.18E+03 | 1.31E+03 | 1.89E+03 | 1.69E+03 | 2.30E+03 | 1.20E+03 | 1.77E+03 | 4.89E-09     | 1.05E+05           |
| <b>MAXDEV frequency</b> |                  |                     | 4.02%         | 3.08%       | 0.23%              | 4.15%            | 0.24%    | 0.52%    | 0.14%    | 0.43%    | 0.38%    | 0.16%    | 0.43%    | 0.29%    | 0.08%    | 0.17%    |              |                    |
| <b>MINDEV calls</b>     |                  | 5.36E+04            | 6.74E+04      | 2.10E+04    | 3.11E+02           | 1.69E+04         | 1.38E+03 | 1.35E+03 | 1.17E+03 | 1.87E+03 | 1.36E+03 | 2.32E+03 | 2.03E+03 | 2.38E+03 | 1.73E+03 | 1.52E+03 | 6.05E-09     | 1.30E+05           |
| <b>MINDEV frequency</b> |                  |                     | 7.46%         | 2.71%       | 0.32%              | 3.41%            | 0.17%    | 0.18%    | 0.18%    | 0.37%    | 0.47%    | 0.40%    | 0.21%    | 0.32%    | 0.05%    | 0.23%    |              |                    |
