# Supplementary material for: The Sequencing Bead Array (SBA), a Next-Generation Digital Suspension Array
Source: PubMed Central journal article supplement (PMC3792038; doi:10.1371/journal.pone.0076696), 2013-10-07
Supplement: pone.0076696.s008.pdf [file pone.0076696.s008.pdf]

|                         |                  | Reporter population | Polyclonality | Low quality | Uncalled reporters | Called reporters | HPV-16   | HPV-18   | HPV-33   | HPV-35   | HPV-39   | HPV-45   | HPV-52   | HPV-56   | HPV-58   | HPV-59   |
|-------------------------|------------------|---------------------|---------------|-------------|--------------------|------------------|----------|----------|----------|----------|----------|----------|----------|----------|----------|----------|
| <b>X1</b>               | <b>calls</b>     | 1.52E+04            | 2.96E+03      | 8.79E+03    | 1.84E+02           | 3.30E+03         | 1.92E+02 | 1.97E+02 | 3.35E+02 | 3.33E+02 | 3.00E+02 | 4.21E+02 | 3.12E+02 | 5.03E+02 | 4.03E+02 | 3.02E+02 |
|                         | <b>frequency</b> |                     | 19.44%        | 57.70%      | 1.21%              | 21.65%           | 5.82%    | 5.97%    | 10.16%   | 10.10%   | 9.10%    | 12.77%   | 9.46%    | 15.25%   | 12.22%   | 9.16%    |
| <b>X2</b>               | <b>calls</b>     | 2.16E+04            | 5.78E+03      | 9.84E+03    | 2.98E+02           | 5.66E+03         | 3.16E+02 | 3.93E+02 | 6.17E+02 | 6.20E+02 | 5.26E+02 | 7.37E+02 | 4.92E+02 | 8.11E+02 | 6.61E+02 | 4.84E+02 |
|                         | <b>frequency</b> |                     | 26.79%        | 45.60%      | 1.38%              | 26.23%           | 5.59%    | 6.95%    | 10.91%   | 10.96%   | 9.30%    | 13.03%   | 8.70%    | 14.34%   | 11.68%   | 8.56%    |
| <b>X3</b>               | <b>calls</b>     | 1.05E+04            | 1.11E+03      | 8.12E+03    | 1.25E+02           | 1.17E+03         | 6.50E+01 | 8.10E+01 | 1.27E+02 | 1.22E+02 | 1.01E+02 | 1.38E+02 | 1.13E+02 | 1.93E+02 | 1.40E+02 | 8.90E+01 |
|                         | <b>frequency</b> |                     | 10.53%        | 77.18%      | 1.19%              | 11.11%           | 5.56%    | 6.93%    | 10.86%   | 10.44%   | 8.64%    | 11.80%   | 9.67%    | 16.51%   | 11.98%   | 7.61%    |
| <b>X4</b>               | <b>calls</b>     | 1.74E+04            | 4.56E+03      | 7.53E+03    | 3.90E+02           | 4.90E+03         | 3.07E+02 | 3.09E+02 | 4.89E+02 | 5.39E+02 | 4.13E+02 | 6.69E+02 | 4.45E+02 | 7.10E+02 | 5.64E+02 | 4.59E+02 |
|                         | <b>frequency</b> |                     | 26.22%        | 43.33%      | 2.24%              | 28.21%           | 6.26%    | 6.30%    | 9.97%    | 10.99%   | 8.42%    | 13.64%   | 9.07%    | 14.48%   | 11.50%   | 9.36%    |
| <b>X5</b>               | <b>calls</b>     | 1.28E+04            | 3.00E+03      | 6.65E+03    | 1.46E+02           | 3.03E+03         | 1.49E+02 | 2.13E+02 | 3.13E+02 | 3.27E+02 | 3.28E+02 | 3.58E+02 | 3.55E+02 | 4.16E+02 | 3.12E+02 | 2.61E+02 |
|                         | <b>frequency</b> |                     | 23.35%        | 51.87%      | 1.14%              | 23.64%           | 4.91%    | 7.03%    | 10.32%   | 10.78%   | 10.82%   | 11.81%   | 11.71%   | 13.72%   | 10.29%   | 8.61%    |
| <b>X6</b>               | <b>calls</b>     | 1.04E+04            | 1.20E+03      | 7.78E+03    | 1.89E+02           | 1.18E+03         | 6.70E+01 | 6.90E+01 | 1.24E+02 | 1.23E+02 | 1.31E+02 | 1.35E+02 | 1.45E+02 | 1.57E+02 | 1.21E+02 | 1.12E+02 |
|                         | <b>frequency</b> |                     | 11.58%        | 75.16%      | 1.83%              | 11.43%           | 5.66%    | 5.83%    | 10.47%   | 10.39%   | 11.06%   | 11.40%   | 12.25%   | 13.26%   | 10.22%   | 9.46%    |
| <b>AVG calls</b>        |                  | 1.46E+04            | 3.10E+03      | 8.12E+03    | 2.22E+02           | 3.21E+03         | 1.83E+02 | 2.10E+02 | 3.34E+02 | 3.44E+02 | 3.00E+02 | 4.10E+02 | 3.10E+02 | 4.65E+02 | 3.67E+02 | 2.85E+02 |
| <b>AVG frequency</b>    |                  |                     | 19.65%        | 58.47%      | 1.50%              | 20.38%           | 5.63%    | 6.50%    | 10.45%   | 10.61%   | 9.56%    | 12.41%   | 10.14%   | 14.59%   | 11.32%   | 8.79%    |
| <b>STDEV calls</b>      |                  | 4.35E+03            | 1.84E+03      | 1.10E+03    | 1.02E+02           | 1.85E+03         | 1.11E+02 | 1.26E+02 | 1.96E+02 | 2.06E+02 | 1.63E+02 | 2.56E+02 | 1.55E+02 | 2.65E+02 | 2.20E+02 | 1.67E+02 |
| <b>STDEV frequency</b>  |                  |                     | 7.16%         | 14.61%      | 0.44%              | 7.40%            | 0.44%    | 0.53%    | 0.38%    | 0.36%    | 1.12%    | 0.87%    | 1.47%    | 1.16%    | 0.86%    | 0.69%    |
| <b>MAXDEV calls</b>     |                  | 6.92E+03            | 2.68E+03      | 1.72E+03    | 1.68E+02           | 2.45E+03         | 1.33E+02 | 1.83E+02 | 2.83E+02 | 2.76E+02 | 2.26E+02 | 3.27E+02 | 1.82E+02 | 3.46E+02 | 2.94E+02 | 2.00E+02 |
| <b>MAXDEV frequency</b> |                  |                     | 7.14%         | 18.70%      | 0.75%              | 7.83%            | 0.63%    | 0.52%    | 0.46%    | 0.38%    | 1.51%    | 1.23%    | 2.10%    | 1.92%    | 0.90%    | 0.67%    |
| <b>MINDEV calls</b>     |                  | 4.29E+03            | 1.99E+03      | 1.47E+03    | 9.70E+01           | 2.04E+03         | 1.18E+02 | 1.41E+02 | 2.10E+02 | 2.22E+02 | 1.99E+02 | 2.75E+02 | 1.97E+02 | 3.08E+02 | 2.46E+02 | 1.96E+02 |
| <b>MINDEV frequency</b> |                  |                     | 9.12%         | 15.15%      | 0.36%              | 9.27%            | 0.72%    | 0.67%    | 0.48%    | 0.51%    | 1.13%    | 1.01%    | 1.45%    | 1.33%    | 1.10%    | 1.18%    |
| <b>THRESHOLD</b>        |                  |                     |               |             |                    |                  | 5.16E+02 | 5.90E+02 | 9.21E+02 | 9.63E+02 | 7.89E+02 | 1.18E+03 | 7.74E+02 | 1.26E+03 | 1.03E+03 | 7.85E+02 |
