# Supplementary material for: The Sequencing Bead Array (SBA), a Next-Generation Digital Suspension Array
Source: PubMed Central journal article supplement (PMC3792038; doi:10.1371/journal.pone.0076696), 2013-10-07
Supplement: pone.0076696.s009.pdf [file pone.0076696.s009.pdf]

|           |                         | Reporter population | Polyclonality | Low quality | Uncalled reporters | Called reporters | HPV-16   | HPV-18   | HPV-33   | HPV-35   | HPV-39   | HPV-45   | HPV-52   | HPV-56   | HPV-58   | HPV-59   |
|-----------|-------------------------|---------------------|---------------|-------------|--------------------|------------------|----------|----------|----------|----------|----------|----------|----------|----------|----------|----------|
| <b>X1</b> | <b>calls</b>            | 8.91E+04            | 3.62E+04      | 2.38E+04    | 1.10E+03           | 2.80E+04         | 2.64E+03 | 3.78E+03 | 6.12E+03 | 3.40E+02 | 2.66E+02 | 6.48E+03 | 2.76E+02 | 3.51E+02 | 2.73E+02 | 7.44E+03 |
|           | <b>frequency</b>        |                     | 40.68%        | 26.71%      | 1.23%              | 31.37%           | 9.43%    | 13.52%   | 21.89%   | 1.22%    | 0.95%    | 23.16%   | 0.99%    | 1.26%    | 0.98%    | 26.61%   |
| <b>X2</b> | <b>calls</b>            | 2.31E+05            | 9.66E+04      | 6.85E+04    | 3.39E+03           | 6.23E+04         | 8.00E+03 | 8.14E+03 | 1.22E+04 | 8.16E+02 | 5.12E+02 | 1.53E+04 | 5.38E+02 | 7.76E+02 | 7.03E+02 | 1.53E+04 |
|           | <b>frequency</b>        |                     | 41.85%        | 29.70%      | 1.47%              | 26.99%           | 12.85%   | 13.07%   | 19.60%   | 1.31%    | 0.82%    | 24.53%   | 0.86%    | 1.25%    | 1.13%    | 24.58%   |
| <b>X3</b> | <b>calls</b>            | 2.27E+05            | 9.25E+04      | 6.70E+04    | 2.82E+03           | 6.45E+04         | 7.79E+03 | 7.93E+03 | 1.21E+04 | 1.10E+03 | 7.32E+02 | 1.60E+04 | 7.09E+02 | 9.96E+02 | 8.97E+02 | 1.63E+04 |
|           | <b>frequency</b>        |                     | 40.79%        | 29.54%      | 1.24%              | 28.42%           | 12.09%   | 12.30%   | 18.70%   | 1.70%    | 1.14%    | 24.77%   | 1.10%    | 1.55%    | 1.39%    | 25.27%   |
| <b>X4</b> | <b>calls</b>            | 2.22E+05            | 7.89E+04      | 9.48E+04    | 4.64E+03           | 4.40E+04         | 6.07E+03 | 5.30E+03 | 8.03E+03 | 7.09E+02 | 4.41E+02 | 1.07E+04 | 4.18E+02 | 7.02E+02 | 5.75E+02 | 1.11E+04 |
|           | <b>frequency</b>        |                     | 35.49%        | 42.63%      | 2.09%              | 19.79%           | 13.79%   | 12.04%   | 18.24%   | 1.61%    | 1.00%    | 24.31%   | 0.95%    | 1.60%    | 1.31%    | 25.16%   |
| <b>X5</b> | <b>calls</b>            | 1.86E+05            | 7.33E+04      | 5.87E+04    | 2.90E+03           | 5.12E+04         | 7.20E+03 | 6.16E+03 | 9.62E+03 | 7.36E+02 | 5.30E+02 | 1.27E+04 | 5.12E+02 | 8.20E+02 | 6.61E+02 | 1.23E+04 |
|           | <b>frequency</b>        |                     | 39.40%        | 31.54%      | 1.56%              | 27.50%           | 14.07%   | 12.03%   | 18.78%   | 1.44%    | 1.04%    | 24.83%   | 1.00%    | 1.60%    | 1.29%    | 23.93%   |
| <b>X6</b> | <b>calls</b>            | 2.69E+05            | 1.06E+05      | 8.15E+04    | 4.85E+03           | 7.67E+04         | 1.08E+04 | 8.85E+03 | 1.41E+04 | 1.18E+03 | 8.14E+02 | 1.93E+04 | 7.05E+02 | 1.25E+03 | 1.17E+03 | 1.85E+04 |
|           | <b>frequency</b>        |                     | 39.33%        | 30.34%      | 1.80%              | 28.52%           | 14.11%   | 11.55%   | 18.42%   | 1.54%    | 1.06%    | 25.17%   | 0.92%    | 1.63%    | 1.52%    | 24.08%   |
|           | <b>AVG calls</b>        | 2.04E+05            | 8.05E+04      | 6.57E+04    | 3.28E+03           | 5.44E+04         | 7.09E+03 | 6.69E+03 | 1.04E+04 | 8.13E+02 | 5.49E+02 | 1.34E+04 | 5.26E+02 | 8.16E+02 | 7.12E+02 | 1.35E+04 |
|           | <b>AVG frequency</b>    |                     | 39.59%        | 31.74%      | 1.57%              | 27.10%           | 12.72%   | 12.42%   | 19.27%   | 1.47%    | 1.00%    | 24.46%   | 0.97%    | 1.48%    | 1.27%    | 24.94%   |
|           | <b>STDEV calls</b>      | 6.21E+04            | 2.47E+04      | 2.41E+04    | 1.37E+03           | 1.72E+04         | 2.69E+03 | 1.95E+03 | 2.98E+03 | 3.01E+02 | 1.99E+02 | 4.48E+03 | 1.67E+02 | 3.01E+02 | 3.01E+02 | 3.99E+03 |
|           | <b>STDEV frequency</b>  |                     | 2.22%         | 5.57%       | 0.33%              | 3.89%            | 1.80%    | 0.74%    | 1.36%    | 0.18%    | 0.11%    | 0.70%    | 0.08%    | 0.18%    | 0.19%    | 0.98%    |
|           | <b>MAXDEV calls</b>     | 6.47E+04            | 2.51E+04      | 2.91E+04    | 1.56E+03           | 2.22E+04         | 3.73E+03 | 2.16E+03 | 3.76E+03 | 3.66E+02 | 2.65E+02 | 5.89E+03 | 1.83E+02 | 4.34E+02 | 4.53E+02 | 4.99E+03 |
|           | <b>MAXDEV frequency</b> |                     | 2.26%         | 10.89%      | 0.52%              | 4.27%            | 1.39%    | 1.10%    | 2.61%    | 0.23%    | 0.13%    | 0.71%    | 0.13%    | 0.15%    | 0.25%    | 1.67%    |
|           | <b>MINDEV calls</b>     | 1.15E+05            | 4.43E+04      | 4.19E+04    | 2.18E+03           | 2.65E+04         | 4.45E+03 | 2.91E+03 | 4.24E+03 | 4.73E+02 | 2.83E+02 | 6.93E+03 | 2.50E+02 | 4.65E+02 | 4.39E+02 | 6.03E+03 |
|           | <b>MINDEV frequency</b> |                     | 4.10%         | 5.03%       | 0.33%              | 7.31%            | 3.29%    | 0.87%    | 1.03%    | 0.25%    | 0.18%    | 1.30%    | 0.11%    | 0.23%    | 0.29%    | 1.01%    |
