# Supplementary material for: The Sequencing Bead Array (SBA), a Next-Generation Digital Suspension Array
Source: PubMed Central journal article supplement (PMC3792038; doi:10.1371/journal.pone.0076696), 2013-10-07
Supplement: pone.0076696.s010.pdf [file pone.0076696.s010.pdf]

|         |           | Reporter population | Polyclonality | Low quality | Uncalled reporters | Called reporters | HPV-16   | HPV-18   | HPV-33   | HPV-35   | HPV-39   | HPV-45   | HPV-52   | HPV-56   | HPV-58   | HPV-59   |
|---------|-----------|---------------------|---------------|-------------|--------------------|------------------|----------|----------|----------|----------|----------|----------|----------|----------|----------|----------|
| OM-1078 | calls     | 1.09E+05            | 4.86E+04      | 4.90E+04    | 1.24E+03           | 9.98E+03         | 7.67E+03 | 1.03E+02 | 2.21E+02 | 2.24E+02 | 1.78E+02 | 2.61E+02 | 2.88E+02 | 4.52E+02 | 3.80E+02 | 2.01E+02 |
|         | frequency |                     | 44.68%        | 45.02%      | 1.14%              | 9.17%            | 76.87%   | 1.03%    | 2.21%    | 2.24%    | 1.78%    | 2.62%    | 2.89%    | 4.53%    | 3.81%    | 2.01%    |
| OM-1272 | calls     | 1.16E+05            | 5.34E+04      | 4.79E+04    | 1.53E+03           | 1.31E+04         | 8.85E+03 | 2.64E+02 | 4.60E+02 | 4.62E+02 | 3.87E+02 | 4.81E+02 | 4.81E+02 | 7.33E+02 | 5.85E+02 | 4.11E+02 |
|         | frequency |                     | 46.03%        | 41.34%      | 1.32%              | 11.31%           | 67.48%   | 2.01%    | 3.51%    | 3.52%    | 2.95%    | 3.67%    | 3.67%    | 5.59%    | 4.46%    | 3.13%    |
| OM-1299 | calls     | 3.83E+04            | 8.24E+03      | 2.67E+04    | 3.28E+02           | 2.98E+03         | 2.44E+02 | 1.99E+02 | 2.88E+02 | 3.45E+02 | 2.58E+02 | 2.75E+02 | 2.96E+02 | 5.55E+02 | 3.00E+02 | 2.19E+02 |
|         | frequency |                     | 21.52%        | 69.83%      | 0.86%              | 7.79%            | 8.19%    | 6.68%    | 9.67%    | 11.58%   | 8.66%    | 9.23%    | 9.94%    | 18.63%   | 10.07%   | 7.35%    |
| OM-1301 | calls     | 4.84E+04            | 1.89E+04      | 1.61E+04    | 7.19E+02           | 1.27E+04         | 7.01E+03 | 4.22E+02 | 6.27E+02 | 6.00E+02 | 5.46E+02 | 7.97E+02 | 6.67E+02 | 8.05E+02 | 6.57E+02 | 5.65E+02 |
|         | frequency |                     | 39.09%        | 33.19%      | 1.49%              | 26.23%           | 55.21%   | 3.32%    | 4.94%    | 4.73%    | 4.30%    | 6.28%    | 5.25%    | 6.34%    | 5.18%    | 4.45%    |
| OM-1452 | calls     | 9.96E+04            | 3.96E+04      | 4.30E+04    | 1.07E+03           | 1.59E+04         | 3.52E+02 | 1.10E+04 | 4.50E+02 | 5.12E+02 | 5.55E+02 | 5.92E+02 | 3.84E+02 | 7.19E+02 | 7.98E+02 | 5.88E+02 |
|         | frequency |                     | 39.77%        | 43.19%      | 1.07%              | 15.98%           | 2.21%    | 68.91%   | 2.83%    | 3.22%    | 3.49%    | 3.72%    | 2.41%    | 4.52%    | 5.01%    | 3.69%    |
| OM-1464 | calls     | 6.03E+04            | 2.08E+04      | 3.45E+04    | 4.38E+02           | 4.48E+03         | 3.85E+03 | 2.30E+01 | 5.90E+01 | 5.10E+01 | 3.90E+01 | 7.00E+01 | 6.80E+01 | 1.17E+02 | 1.22E+02 | 7.80E+01 |
|         | frequency |                     | 34.56%        | 57.28%      | 0.73%              | 7.43%            | 86.00%   | 0.51%    | 1.32%    | 1.14%    | 0.87%    | 1.56%    | 1.52%    | 2.61%    | 2.72%    | 1.74%    |
| OM-1530 | calls     | 7.43E+04            | 4.05E+04      | 1.95E+04    | 1.42E+03           | 1.29E+04         | 1.14E+04 | 8.90E+01 | 1.55E+02 | 1.79E+02 | 8.40E+01 | 1.79E+02 | 1.30E+02 | 2.87E+02 | 2.41E+02 | 1.79E+02 |
|         | frequency |                     | 54.45%        | 26.27%      | 1.91%              | 17.37%           | 88.21%   | 0.69%    | 1.20%    | 1.39%    | 0.65%    | 1.39%    | 1.01%    | 2.22%    | 1.87%    | 1.39%    |
| OM-1569 | calls     | 4.92E+04            | 1.79E+04      | 1.60E+04    | 6.13E+02           | 1.46E+04         | 1.23E+02 | 1.58E+02 | 2.25E+02 | 1.98E+02 | 2.09E+02 | 3.42E+02 | 2.53E+02 | 3.59E+02 | 2.69E+02 | 1.25E+04 |
|         | frequency |                     | 36.47%        | 32.59%      | 1.25%              | 29.69%           | 0.84%    | 1.08%    | 1.54%    | 1.36%    | 1.43%    | 2.34%    | 1.73%    | 2.46%    | 1.84%    | 85.38%   |
| OM-1668 | calls     | 4.15E+04            | 1.50E+04      | 1.26E+04    | 7.43E+02           | 1.31E+04         | 3.21E+02 | 4.15E+02 | 5.58E+02 | 5.85E+02 | 5.29E+02 | 7.95E+02 | 7.16E+02 | 8.55E+02 | 6.49E+02 | 7.70E+03 |
|         | frequency |                     | 36.23%        | 30.36%      | 1.79%              | 31.62%           | 2.45%    | 3.16%    | 4.25%    | 4.46%    | 4.03%    | 6.06%    | 5.45%    | 6.51%    | 4.94%    | 58.69%   |
| OM-1741 | calls     | 6.63E+04            | 3.26E+04      | 2.51E+04    | 7.25E+02           | 7.83E+03         | 1.21E+02 | 6.42E+03 | 1.18E+02 | 1.24E+02 | 2.09E+02 | 1.65E+02 | 1.09E+02 | 1.73E+02 | 2.77E+02 | 1.20E+02 |
|         | frequency |                     | 49.23%        | 37.86%      | 1.09%              | 11.82%           | 1.54%    | 81.92%   | 1.51%    | 1.58%    | 2.67%    | 2.11%    | 1.39%    | 2.21%    | 3.54%    | 1.53%    |
| OM-1751 | calls     | 2.02E+04            | 7.57E+03      | 7.54E+03    | 2.88E+02           | 4.77E+03         | 3.35E+03 | 8.50E+01 | 1.20E+02 | 1.47E+02 | 1.33E+02 | 1.96E+02 | 1.84E+02 | 2.37E+02 | 1.50E+02 | 1.67E+02 |
|         | frequency |                     | 37.56%        | 37.38%      | 1.43%              | 23.63%           | 70.22%   | 1.78%    | 2.52%    | 3.08%    | 2.79%    | 4.11%    | 3.86%    | 4.97%    | 3.15%    | 3.50%    |
| OM-1848 | calls     | 4.50E+04            | 1.68E+04      | 1.45E+04    | 4.37E+02           | 1.33E+04         | 1.45E+02 | 1.46E+02 | 2.08E+02 | 1.91E+02 | 2.25E+02 | 1.13E+04 | 2.80E+02 | 3.13E+02 | 2.64E+02 | 2.38E+02 |
|         | frequency |                     | 37.25%        | 32.25%      | 0.97%              | 29.53%           | 1.09%    | 1.10%    | 1.56%    | 1.44%    | 1.69%    | 84.88%   | 2.11%    | 2.35%    | 1.99%    | 1.79%    |
| OM-1854 | calls     | 3.98E+04            | 1.23E+04      | 1.79E+04    | 5.62E+02           | 9.12E+03         | 1.47E+02 | 6.86E+03 | 2.01E+02 | 2.49E+02 | 2.15E+02 | 3.20E+02 | 2.74E+02 | 3.51E+02 | 2.68E+02 | 2.31E+02 |
|         | frequency |                     | 30.80%        | 44.89%      | 1.41%              | 22.91%           | 1.61%    | 75.26%   | 2.20%    | 2.73%    | 2.36%    | 3.51%    | 3.00%    | 3.85%    | 2.94%    | 2.53%    |
| OM-1967 | calls     | 1.06E+05            | 4.85E+04      | 4.43E+04    | 1.44E+03           | 1.20E+04         | 9.39E+03 | 2.76E+02 | 2.43E+02 | 2.84E+02 | 2.26E+02 | 2.70E+02 | 2.33E+02 | 4.35E+02 | 3.60E+02 | 3.04E+02 |
|         | frequency |                     | 45.63%        | 41.71%      | 1.36%              | 11.31%           | 78.12%   | 2.30%    | 2.02%    | 2.36%    | 1.88%    | 2.25%    | 1.94%    | 3.62%    | 2.99%    | 2.53%    |
| OM-1980 | calls     | 8.48E+04            | 4.16E+04      | 2.50E+04    | 9.64E+02           | 1.72E+04         | 1.90E+02 | 1.23E+04 | 3.90E+02 | 8.19E+02 | 4.65E+02 | 7.00E+02 | 6.34E+02 | 6.53E+02 | 5.09E+02 | 6.18E+02 |
|         | frequency |                     | 49.08%        | 29.45%      | 1.14%              | 20.34%           | 1.10%    | 71.13%   | 2.26%    | 4.75%    | 2.70%    | 4.06%    | 3.68%    | 3.79%    | 2.95%    | 3.58%    |
| OM-2006 | calls     | 7.03E+04            | 2.85E+04      | 3.56E+04    | 4.78E+02           | 5.68E+03         | 4.08E+03 | 9.30E+01 | 1.21E+02 | 2.35E+02 | 1.31E+02 | 1.68E+02 | 2.19E+02 | 1.97E+02 | 1.96E+02 | 2.44E+02 |
|         | frequency |                     | 40.52%        | 50.72%      | 0.68%              | 8.08%            | 71.76%   | 1.64%    | 2.13%    | 4.14%    | 2.31%    | 2.96%    | 3.86%    | 3.47%    | 3.45%    | 4.30%    |
| OM-2059 | calls     | 6.09E+04            | 1.96E+04      | 3.62E+04    | 4.17E+02           | 4.62E+03         | 3.16E+03 | 8.70E+01 | 1.38E+02 | 2.23E+02 | 1.22E+02 | 1.53E+02 | 1.76E+02 | 1.76E+02 | 1.62E+02 | 2.18E+02 |
|         | frequency |                     | 32.21%        | 59.52%      | 0.69%              | 7.59%            | 68.49%   | 1.88%    | 2.99%    | 4.83%    | 2.64%    | 3.31%    | 3.81%    | 3.81%    | 3.51%    | 4.72%    |
| OM-2215 | calls     | 1.21E+05            | 6.43E+04      | 3.50E+04    | 1.28E+03           | 2.03E+04         | 4.15E+03 | 1.11E+04 | 4.55E+02 | 7.86E+02 | 5.48E+02 | 6.11E+02 | 6.60E+02 | 6.81E+02 | 5.61E+02 | 7.12E+02 |
|         | frequency |                     | 53.23%        | 28.94%      | 1.06%              | 16.77%           | 20.49%   | 54.75%   | 2.25%    | 3.88%    | 2.71%    | 3.02%    | 3.26%    | 3.36%    | 2.77%    | 3.52%    |
| OM-2257 | calls     | 7.55E+04            | 4.18E+04      | 2.37E+04    | 8.90E+02           | 9.18E+03         | 6.42E+03 | 1.75E+02 | 2.34E+02 | 4.01E+02 | 2.46E+02 | 3.23E+02 | 3.65E+02 | 3.68E+02 | 2.79E+02 | 3.75E+02 |
|         | frequency |                     | 55.34%        | 31.32%      | 1.18%              | 12.16%           | 69.87%   | 1.91%    | 2.55%    | 4.37%    | 2.68%    | 3.52%    | 3.98%    | 4.01%    | 3.04%    | 4.08%    |
| OM-2258 | calls     | 1.53E+05            | 5.95E+04      | 6.51E+04    | 1.35E+03           | 2.68E+04         | 8.48E+03 | 3.14E+02 | 6.12E+02 | 5.93E+02 | 5.85E+02 | 1.35E+04 | 5.32E+02 | 8.67E+02 | 8.92E+02 | 4.61E+02 |
|         | frequency |                     | 38.96%        | 42.59%      | 0.88%              | 17.57%           | 31.62%   | 1.17%    | 2.28%    | 2.21%    | 2.18%    | 50.28%   | 1.98%    | 3.23%    | 3.32%    | 1.72%    |
